1  
2  
3  
4  
5  
6  
7  
8  
9  
10  
11  
12  
13  
14  
15  
16  
17  
18  
19  
20  
21  
22  
23  
24  
25  
26  
27  
28  
29  
30  
31  
32  
33

## Article Category: Research Articles

# NF- $\kappa$ B Decoy ODN-Loaded Poly lactic-co-glycolic Acid

## Nanospheres Inhibit Alveolar Ridge Resorption

Albert Chun Shuo Huang<sup>1</sup>, Yuji Ishida<sup>1\*</sup>, Kai LI<sup>1</sup>, Duantawan Rintanalert<sup>1,2</sup>, Kasumi Hatano-sato<sup>1</sup>, Shuji Oishi<sup>1</sup>, Jun Hosomichi<sup>1</sup>, Risa Usumi-Fujita<sup>1</sup>, Hiroyuki Yamaguchi<sup>1,3</sup>, Hiroyuki Tsujimoto<sup>4</sup>, Aiko Sasai<sup>4</sup>, Ayaka Ochi<sup>4</sup>, Hajime Watanabe<sup>5</sup>, Takashi Ono<sup>1</sup>

<sup>1</sup> Department of Orthodontic Science, Graduate School of Medical and Dental Sciences, Tokyo Medical and Dental University (TMDU), Tokyo, Japan

<sup>2</sup> Department of Orthodontics, Faculty of Dentistry, Chulalongkorn University, Bangkok, Thailand

<sup>3</sup> Department of Pediatrics, McGovern Medical School, The University of Texas Health Science Center at Houston, Houston, Texas, USA

<sup>4</sup> Pharmaceutical / Beauty Science Research Center, Material Business Division, Hosokawa Micron Corporation, Osaka, Japan

<sup>5</sup>, AnGes, Inc., Tokyo, Japan

### \* Correspondence:

Yuji Ishida, Department of Orthodontic Science, Graduate School of Medical and Dental Sciences, Tokyo Medical and Dental University (TMDU), 1-5-45 Yushima, Bunkyo-ku, Tokyo 113-8549, Japan.

Email: [yjis.orts@tmd.ac.jp](mailto:yjis.orts@tmd.ac.jp)

1) Keywords: Tooth extraction, Alveolar bone loss, Nuclear factor kappa B, Oligodeoxynucleotides, NF-kappaB transcription factor decoy, Poly(lactic-co-glycolic acid) copolymer, Inflammation, Wound healing, Bone remodeling

2) Abstract word count: 200

3) Total word count (Introduction to Discussion): 3192

4) Tables and figures: 7

5) Number of references: 45

34 **Abstract**

35 Residual ridge resorption combined with dimensional loss resulting from tooth  
36 extraction has a prolonged correlation with early excessive inflammation. Nuclear  
37 factor-kappa B (NF- $\kappa$ B) decoy oligodeoxynucleotide (ODN) is a member of a group  
38 of double-stranded DNA capable of downregulating the expression of downstream  
39 genes of the NF- $\kappa$ B pathway. The healing action of its embellished effect combined  
40 with poly(lactic-co-glycolic acid) (PLGA) nanospheres on tooth extraction socket still  
41 remains unknown. Hence, the aim of this study was to investigate the therapeutic  
42 effect of NF- $\kappa$ B decoy ODN-loaded PLGA nanospheres (PLGA-NfD) transfected into  
43 extraction sockets in Wistar/ST rats. Micro-computed tomography and trabecular  
44 bone analysis following treatment with PLGA-NfD demonstrated inhibition of  
45 vertical alveolar bone loss with increased bone volume, smoother trabecular bone  
46 surface, thicker trabecular bone, larger trabecular number and separation, and fewer  
47 bone porosities. Histomorphometric and reverse transcription-quantitative polymerase  
48 chain reaction analysis revealed reduced tartrate-resistant acid phosphatase-expressing  
49 osteoclasts, interleukin-1 $\beta$ , tumor necrosis factor- $\alpha$ , receptor activator of NF- $\kappa$ B  
50 ligand, turnover rate and increased transforming growth factor- $\beta$ 1 immunopositive  
51 reactions and relative gene expressions. These data demonstrate that local delivery of  
52 PLGA-NfD could be used as a substantial suppressor of inflammation during the  
53 healing process in a tooth extraction socket, with the potential of accelerated new  
54 bone formation.

55

56

57

58

59

60

61

62

63

64

65

## 66 Introduction

67 Tooth extraction followed by early excessive inflammation often leads to progressive,  
68 long-term atrophy of residual ridge, which causes alveolar bone deformities (Pagni et  
69 al. 2012). Bone resorption involves two phases: a drastic vertical reduction caused by  
70 bundle bone resorption in the first phase, followed by overall horizontal and vertical  
71 tissue contraction in the second phase, including resorption of the outer surfaces of  
72 bone walls; the resorption gradually occurs throughout life (Ashman 2000). Although  
73 other studies (Hansson and Halldin 2012; Araújo et al. 2015) also summarized the  
74 possibility of bone physiology, the mechanism underlying short- and long-term  
75 resorption after tooth extraction, which furthermore causes residual ridge resorption  
76 (RRR), remains unknown. This dimensional loss would result in an unfavorable  
77 impact on limited diagnostic alternatives in subsequent restorative dental therapy  
78 (Avila-Ortiz et al. 2014; Couso-Queiruga et al. 2021).

79  
80 Numerous approaches have been attempted to manipulate the inhibitor of the nuclear  
81 factor-kappa B (NF- $\kappa$ B) signaling pathway, which is well known for its importance in  
82 regulating prototypical proinflammatory signaling, physiological bone metabolism,  
83 pathologic bone destruction, and bone regeneration (Liu et al. 2017). Decoy  
84 oligodeoxynucleotide (ODN) is a member of a group of double-stranded DNA  
85 fragments that possess the same sequence as the binding site of the transcription  
86 factor on DNA (Zaki Ahmad et al. 2013). NF- $\kappa$ B decoy ODN is capable of  
87 downregulating the expression of downstream genes of the NF- $\kappa$ B pathway, such as  
88 proinflammatory cytokine and osteoclastogenesis genes (Lin et al. 2017). Inhibition of  
89 NF- $\kappa$ B by decoy ODNs was reported to be effective against osteoclast differentiation  
90 and activation *in vitro*, with a therapeutic effect in decreasing bone resorption *in vivo*  
91 (Lin et al. 2016), as well as its application in various bone metabolic diseases.  
92 However, the application of NF- $\kappa$ B decoy ODN in the field of alveolar bone  
93 extraction socket healing remained a lack of investigation. In this study, we presumed  
94 the therapeutic potential of NF- $\kappa$ B decoy ODN in the prevention of bone loss in  
95 extraction sockets caused by early inflammation.

96  
97 Poly(lactic-co-glycolic acid) (PLGA) synthesized as nanospheres (NS) has been used  
98 as an efficient vector for drug delivery system of decoy ODNs in the nuclear medical  
99 field due to its capabilities of safety, enhanced stability, bioavailability, and long-term  
100 release (De Stefano et al. 2009). Moreover, improved pharmacokinetics of PLGA  
101 with NF- $\kappa$ B decoy ODN were suggested to represent a promising strategy to  
102 effectively inhibit the transcriptional activity of NF- $\kappa$ B in the inflammatory process.  
103 NF- $\kappa$ B decoy ODN-loaded PLGA NS (PLGA-NfD) were reported to feature excellent  
104 affinity for and adsorption to the surfaces of anionic cells derived from phosphate  
105 groups when introduced into cells through the mechanism of receptor-mediated  
106 endocytosis (Yakubov et al. 1989; Tsujimoto and Kawashima 2018). Nonetheless, the  
107 approach of PLGA-NfD has yet to be used in murine to evaluate tooth extraction  
108 socket healing.

109

110 Thus, this study fills a gap in the scientific literature by addressing the need for the  
111 application of PLGA-NfD to the extraction socket. It is hypothesized that early  
112 excessive alveolar bone inflammation after tooth extraction can be suppressed by  
113 applying PLGA-NfD to the extraction socket. The aims of this study were twofold: 1)  
114 investigate the downstream effects of NF- $\kappa$ B suppression on the expression of  
115 proinflammatory cytokine and osteoclastogenesis genes in rat extraction socket  
116 tissues during the early healing stage and 2) survey the possibility of a persistent  
117 long-term effect of decoy ODN-loaded PLGA NS to alveolar bone tissues *in vivo*  
118 using local administration in rat extraction sockets.

119

120

121

122

123

124

125

126

127

128

129

130

131

132

133

134

135

136

## 137 **Results**

### 138 ***Vertical Bone Height Loss***

139 Micro-computed tomography analysis demonstrated that the vertical bone height of  
140 extraction sockets decreased on D7 and D28 in all experimental groups (Fig. 1  
141 A-C). PLGA-NfD showed a significantly inhibited height loss in the buccal and  
142 middle aspects compared to phosphate-buffered saline (PBS), naked scrambled decoy  
143 ODN (ScD), and PLGA-scrambled decoy ODN (PLGA-ScD) on D7, with a  
144 significant decrease in the palatal and distal aspects compared to PBS and ScD  
145 (Supplementary Table 1). NfD on D7 showed a decreasing tendency in the buccal  
146 aspect compared with ScD, but there was no significant difference when compared to  
147 PLGA-NfD. There were no significant differences between the control and  
148 experimental groups in the mesial aspect on D7. On D28, PLGA-NfD showed a  
149 significantly inhibited height loss in all aspects compared with PBS, a significantly  
150 decreased loss of ScD in the buccal and distal aspects; a decreased loss of NfD in the  
151 palatal, mesial and distal aspects; and a decreased loss of PLGA-ScD in the palatal  
152 aspect.

### 153 ***3D Trabecular Bone Analysis***

154 Representative 3D images of volume of interest (VOI) of the extraction socket in all  
155 groups are shown in Fig. 1D. In PLGA-NfD, bone volume fraction (BV/TV, %), bone  
156 mineral density (BMD, mg/cm<sup>3</sup>), trabecular thickness (Tb.Th, μm), trabecular number  
157 (Tb.N, per mm), and trabecular star volume (V\*tr, mm<sup>3</sup>) were significantly increased  
158 on D7 compared to PBS, ScD, and PLGA-ScD (Fig. 1E-M; Supplementary Table 2).  
159 There were significant differences between NfD with ScD in BMD and NfD with ScD  
160 and PBS in Tb.Th, with higher values among the parameters. In contrast, the bone  
161 surface ratio (BS/BV, per mm), trabecular separation (Tb.Sp, μm), trabecular spacing  
162 (Tb.Spac, μm), bone marrow space star volume (V\*m.space, mm<sup>3</sup>), and of  
163 PLGA-NfD significantly decreased on D7 compared to PBS, ScD, and PLGA-ScD.  
164 NfD had a significantly decreased value with ScD in BS/BV and a decreased value of  
165 V\*m.space with PBS. On D28, a similar tendency was found in PLGA-NfD, with  
166 significantly increased BV/TV, BMD, Tb.Th, Tb.N, and V\*tr but decreased BS/BV,  
167 Tb.Sp, Tb.Spac, and V\*m.space between the control and experimental groups. There  
168 was no significant difference in NfD with a similar tendency as D7 when compared to  
169 the control and experimental groups.

### 170 ***Hematoxylin & Eosin, TRAP, and ALP Staining***

171 On D7, hematoxylin & eosin staining revealed the phenomenon that inflammatory  
172 infiltrates were reduced, whereas the amount of woven and trabecular bone presented  
173 in PLGA-NfD was increased. Tartrate-resistant acid phosphatase (TRAP) staining  
174 showed a reduced tendency of reaction, whereas alkaline phosphatase (ALP) staining  
175 presented with enhanced ones (Fig. 2A-C). On D28, PBS, ScD, NfD, and PLGA-ScD  
176 were characterized by relatively increased inflammatory infiltrates and decreased

177 trabecular bone presentation. Moreover, immature bone formation was relatively  
178 increased in these groups compared with the samples in PLGA-NfD. In contrast,  
179 samples treated with PLGA-NfD showed a relatively higher and organized degree of  
180 bone formation and a smaller number of inflammatory cells associated with thicker  
181 bone trabeculae, with TRAP and ALP staining showing a similar tendency as D7.  
182 Semi-quantitative analysis of the number of TRAP-positive osteoclast cells on D7  
183 significantly decreased in the PLGA-NfD group compared to the other four groups  
184 (Fig. 2D; Supplementary Table 3). Furthermore, NfD also showed a significantly  
185 decreased value compared to PBS, ScD, and PLGA-ScD, but a significantly increased  
186 value when compared to PLGA-NfD. On D28, all groups showed milder TRAP  
187 expression than on D7. The PLGA-NfD group showed significantly lower values than  
188 the other four groups. The contradictory tendency was discovered in ALP reaction  
189 analyzed with ALP-positive stained area, and the PLGA-NfD group showed a  
190 significantly increased ALP-positive stained area on D7 and D28 than the other four  
191 groups (Fig. 2E; Supplementary Table 4).

### 192 ***In vivo Dynamic Fluorescent Labeling of Extraction Socket***

193 Triple-fluorescence bone labeling with calcein (green), demeclocycline hydrochloride  
194 (yellow), and alizarin complexone (red) on D28 was shown in cross-sections of  
195 extraction sockets among all groups, with the calcein-to-demeclocycline-labeled  
196 surface showing a larger distance than the demeclocycline-to-alizarin-labeled surface.  
197 Representative image of PLGA-NfD demonstrated a tendency for increased bone  
198 formation in both calcein-to-demeclocycline and demeclocycline-to-alizarin-labeled  
199 surfaces compared to the other four groups (Fig. 3).

### 200 ***Immunohistochemical Analysis***

201 Immuno-histomorphometric analyses indicated that positive staining of IL-1 $\beta$  and  
202 TNF- $\alpha$  was mainly observed in inflammatory infiltrates in the intramedullary area in  
203 the newly formed trabecular bone, positive staining for TGF- $\beta$ 1 was observed in the  
204 endothelial and fibroblast-like cells, and positive staining for RANKL was observed  
205 in the osteoblastic lining cells closer to the alveolar bone (Fig. 4A-D). On D7 and D28  
206 in PLGA-NfD, the inflammatory reaction was reduced, which was demonstrated with  
207 a decreased ratio of IL-1 $\beta$  and TNF- $\alpha$  (Supplementary Table 5). Decreased bone  
208 resorption was observed by reduced RANKL expression. In contrast, promotion of  
209 bone formation was also observed with increased expression of TGF- $\beta$ 1. In NfD,  
210 significantly decreased expression of IL-1 $\beta$  and RANKL was observed only on D7,  
211 other expressions were similar to that of PBS, PLGA-ScD, and PLGA-NfD on D7 and  
212 D28 (Fig. 4E-H).

### 213 ***Biochemical analysis***

214 Relative gene expression of IL-1 $\beta$  and TNF- $\alpha$  was decreased in PLGA-NfD than that  
215 in PBS, ScD, and PLGA-ScD on D7 (Fig. 5A-F, Supplementary Table 6). On D28,  
216 PLGA-NfD had significantly decreased expression of IL-1 $\beta$  compared to PBS,  
217 whereas the same significant difference was also found in TNF- $\alpha$  expression with

218 ScD. Regarding osteoclastic activity-related gene expression evaluation, relative gene  
219 expression of RANKL and OPG showed significantly decreased value in PLGA-NfD  
220 than that in PBS, ScD, and PLGA-ScD on D7. On D28, PLGA-NfD had a  
221 significantly decreased expression of RANKL compared to PBS, whereas the same  
222 significant difference was also found in OPG expression with ScD. RANKL/OPG  
223 ratio in PLGA-NfD exhibited a significantly decreased value compared to that in  
224 PLGA-ScD on D7. However, no significant difference was observed on D28.  
225 Regarding the evaluation of osteogenesis-related gene expression, the relative TGF $\beta$ 1  
226 gene expression of PLGA-NfD was increased on both D7 and D28 compared to ScD.  
227 In contrast, on D28, a significantly increased expression of TGF- $\beta$ 1 was also observed  
228 in PLGA-NfD compared to PBS.

229

230

231

232

233

234

235

236

237

238

239

240

241

242

243

244

245



## 246 Discussion

247 To the best of our knowledge, this is the first *in vivo* study to clarify that NF- $\kappa$ B  
248 decoy ODN-loaded PLGA nanospheres (PLGA-NfD) can prevent excessive  
249 inflammation and enhance alveolar healing after tooth extraction. Despite several  
250 studies on RRR (Johnson K. et al. 1963; Sun et al. 2013), its etiological mechanism  
251 remains unclear. Nonetheless, the healing process of a tooth extraction socket is  
252 usually initiated by an inflammatory phase as the beginning of a physiologically  
253 immunological process of defense toward trauma, which inevitably cannot be  
254 prevented (Hile et al. 2005; Hansson and Halldin 2012). Moreover, the continuity of  
255 this sequential aftereffect can generate a considerably greater risk of long-term  
256 dimensional loss of the alveolar ridge. Therefore, the pursuit of the sustainable  
257 therapeutic potential of PLGA-NfD by investigating its anti-inflammatory effect  
258 could be an important issue in extraction socket healing.

259  
260 The ScD was one of the negative controls in the current study; similar experimental  
261 design has also been implemented in previous other studies (Osako et al. 2011; Zaki  
262 Ahmad et al. 2013; Lin et al. 2016; Farahmand et al. 2017). In the current study, ScD  
263 and PLGA-ScD presented identical findings to the vehicle control (*i.e.*, PBS) among  
264 all analyses. Although previous research reported the therapeutic effect of PLGA in  
265 the extraction socket on the alveolar bone height, in the current study, NfD shared  
266 identical tendencies as other groups except PLGA-NfD in almost all analyses on D7.  
267 On D28, NfD showed a diminished effect similar to that of the other groups except for  
268 PLGA-NfD. This indicates the necessity of PLGA as a vector in the current study  
269 design, which periphrastically proves the distinctive effects of PLGA with NfD.  
270 According to previous meta-analyses (Avila-Ortiz et al. 2014; Bassir et al. 2018;  
271 Avila-Ortiz et al. 2019), it has been shown that tooth extraction always triggers a  
272 process of bone resorption, in which the alveolar ridge undergoes progressive atrophy,  
273 which is severe in the apico-coronal dimension. In the current study, we found that  
274 PLGA-NfD administration facilitated the maintenance of alveolar bone height.  
275 Furthermore, sustainable effects of PLGA-NfD were also indicated by trabecular bone  
276 parameters following tooth loss on D7 and D28. Upon PLGA-NfD administration,  
277 morphological findings in  $\mu$ CT demonstrated its preservative effects indicating that  
278 bone resorption could be ceased not only in short-term but also in long-term periods.

279  
280 In previous studies, while describing the histological process of socket healing,  
281 numerous osteoclasts were reported to be found on the outer surface of the crest, with  
282 prominent osteoclastic activity resulting in resorption of both buccal and palatal bone  
283 walls (Farina and Trombelli 2011; Araújo et al. 2015). In the current study, all groups  
284 showed similar tendencies. On D7, all groups showed the undergoing of histologically  
285 apparent beginning of healing process with newly formed trabecular bone, whereas  
286 the PLGA-NfD group demonstrated reduced proliferative inflammatory infiltrates and  
287 TRAP reaction along with increased ALP reaction, indicating the potentiality of  
288 preventing early alveolar bone resorption and promoting bone formation in the



289 extraction socket. On D28, mature and well-defined bony trabeculae filled a large  
290 portion of the alveolar socket with multiple little islands of bone marrow and  
291 connective tissue. Although evidence of reduced inflammatory reaction was noticed  
292 on D28 among all groups compared with that on D7, specifically less exhibition of  
293 inflammatory infiltrates in the intramedullary area of bone marrows among sections in  
294 PLGA-NfD was revealed, presenting the phenomenon of reduced bone resorption.  
295 These histological phenomena can advocate the inhibition of excessive inflammation  
296 with long-term effects being sustained even up to the late healing phase of the  
297 extraction socket. While increased ALP reaction was displayed by increased structural  
298 components in the bone matrix of PLGA-NfD, persistent effect of bone formation  
299 activity in long-term healing could be indicated by *in vivo* dynamic bone labeling with  
300 a tendency of increased distance in both calcein-to-demeclocycline and  
301 demeclocycline-to-alizarin-labeled surfaces, revealing that the mineralization of  
302 newly formed bone also took place in PLGA-NfD until D28 (Fig. 3). These results  
303 indicated that PLGA-NfD could not only inhibit bone resorption, but also bear the  
304 potential of bone healing paralleling within short- and long-term phases.

305  
306 Stimulus pathogens from bacterial infections in the beginning of and during socket  
307 healing are one of the most common reasons for early excessive inflammation and  
308 alveolar bone loss driven by immune response apart from traumatic inflammation  
309 (Teng et al. 2000). This local bone loss was reported to be partly mediated by  
310 inflammatory infiltrates, including neutrophils, lymphocytes, plasma cells, and  
311 macrophages, which subsequently regulate the balance and survival of osteoclasts and  
312 osteoblasts (Fig. 6). In the current research, increased expression of immunopositive  
313 reactions with IL-1 $\beta$  and TNF- $\alpha$  in PBS, ScD, and PLGA-ScD illustrated that the  
314 intervention with these solutions did not appear to suppress the normal physiological  
315 process of healing, which begins with the occurrence of the inflammatory phase. In  
316 previous research, the basic multicellular unit (BMU) was defined as a balance  
317 between bone resorption and formation, including osteoclasts and osteoblasts  
318 (Manolagas 2000; Katagiri and Takahashi 2002; Kim et al. 2012). Based on the  
319 pharmacological mechanism of NfD, it can be implied that the balance of bone  
320 resorption and formation might have been altered because of the decoy effect of  
321 NF- $\kappa$ B during the healing process of the alveolar socket. In a previous *in vitro* study,  
322 selective absorption of NfD into monocytes/macrophages was revealed, leaving other  
323 cells, such as the stromal and osteoblast cells unblemished. Hence, the effect of NfD  
324 was entirely confined to osteoclasts and their progenitor cells, causing reduced  
325 migration of osteoclast precursor cells (Penolazzi et al. 2003; Shimizu et al. 2006).  
326 Based on the previous correlated *in vitro* research, the mechanism of NfD in our *in*  
327 *vivo* immunohistochemical and biochemical results can be illustrated by two ways.  
328 First, because of the downregulated expression of proinflammatory cytokines IL- $\beta$   
329 and TNF- $\alpha$  in inflammatory cells, the production of IL- $\beta$  and TNF- $\alpha$  may have been  
330 reduced. This reduction resulted in reduced stimulation toward the differentiation of  
331 osteoclast precursors, which consequently, resulted in the reduced activation of mono-  
332 and multi-nucleated osteoclasts and polarized resorbing osteoclasts. Second, because

333 of intracellular uptake by endocytosis of PLGA-NfD, downregulation of the  
334 expression of downstream osteoclastogenic genes, such as NFATC1 and TRAP in  
335 osteoclast precursors may have occurred, which directly hindered their differentiation  
336 and consequently caused a significant reduction in these cells, also affecting normal  
337 stromal cells, osteoblasts, and osteocytes and reducing osteoblastic RANKL  
338 expression (Fig. 6). Consequently, the depression of RANKL production in the BMU  
339 would have generated the environment of attenuated inflammation, causing the  
340 inhibition of RANKL activation, thereby preventing bone resorption. Interestingly, we  
341 found that the decoy ODN effect alone determines the decrease in inflammatory  
342 cytokines, which leads to reduced osteoclastic activity. In the current study, TGF- $\beta$ 1  
343 immunopositive reaction was expressed more in NfD on D7 and PLGA-NfD on D7  
344 and 28, leading to osteogenic expression tendency in socket healing. TGF- $\beta$ 1 has been  
345 reported as an immunoregulatory cytokine and bone-derived factor in  
346 osteoimmunology. However, when at high concentration, enhancement of osteoblast  
347 proliferation and downregulation of RANKL expression in osteoblast were observed  
348 (Takai et al. 1998; Karst et al. 2004). This also accounts for the reduced expression of  
349 RANKL in the current study. In other groups that presented a lower concentration of  
350 TGF- $\beta$ 1, osteoclast maturation was facilitated, and even though TGF- $\beta$ 1 expression  
351 increased by its normal physiological mechanism, the potential of bone formation still  
352 could not reach the same level as bone resorption on D28.

353

354 Because of the important role of NF- $\kappa$ B in the differentiation and activation of  
355 osteoclast, selective inhibition of NF- $\kappa$ B by several drugs blocking osteoclastogenesis  
356 has been conducted in previous studies (Bharti et al. 2004; Jimi et al. 2004). Among  
357 the approaches that are merely temporarily downregulated and gradually reduced by  
358 different pathways in transcription factors activity (Deng et al. 2014), decoy ODN is a  
359 relatively sharper approach because of its capability of reducing existing transcription  
360 factors activity and efficiency in suppressing gene expression when one or more  
361 transcription factors negotiate with a single, related cis-element or when those factors  
362 are constitutively produced (Morishita et al. 2004). However, one of the major  
363 limitations of this approach is the rapid degradation of phosphodiester ODN by  
364 intracellular nucleases, which further emphasizes the importance of PLGA as a vector  
365 (Ahn et al. 2002; Park et al. 2003). Previous studies concluded that PLGA NSs were a  
366 promising delivery system for a double-stranded decoy ODN to NF- $\kappa$ B (Tahara et al.  
367 2011; Mehta et al. 2021). Such a system allows sustained ODN release together with  
368 an inhibition of the transcriptional activity of NF- $\kappa$ B in activated macrophages at  
369 significantly lower concentrations compared with naked ODN (De Rosa et al. 2005).  
370 Other *in vivo* studies also reported its biocompatibility and biodegradability as a  
371 potential and promising carrier for oral delivery (Yamaguchi et al. 2017; Li et al.  
372 2021). In the current study, 6-FAM-labeled scrambled decoy ODN-loaded PLGA  
373 nanosphere was used for evaluating the distribution of medicine-loaded PLGA NS  
374 after its administration on D7 and D28. The sustainable effect of PLGA NS was  
375 shown by maintaining 6-FAM-positive cells on D7 and D28, suggesting the results of  
376 enhanced intracellular uptake of decoy ODN released from PLGA (Fig. 7). A

377 previous study reported on the characteristics of technical sensitivity and the  
378 time-consuming nature of periodontal regenerative surgery in clinical dentistry (Xie et  
379 al. 2020). However, as a less invasive, safe, and more manipulative means for topical  
380 administration of PLGA (Hoda et al. 2016), PLGA-NfD can be considered as an  
381 innovative alternative to periodontal regenerative surgery for future clinical  
382 utilization.

383

384 In conclusion, this study demonstrated the importance of renovating the balance of  
385 socket healing remodeling process disrupted by acute early excessive inflammation  
386 caused by excessive osteoclastic activity, which results in net bone loss. By  
387 administering PLGA-NfD, the compromised balance of BMU in the modeling–  
388 remodeling process can be restored and possibly manipulated in the future to prevent  
389 progression of early acute inflammation into long-term chronic inflammation in  
390 alveolar bone-related syndromes.

391

392

393

394

395

396

397

398

399

400

401

402

403

404

405

## 406 **Materials and Methods**

### 407 *Experimental Animals*

408 A total of 62 Wistar/ST male rats (6 weeks old) were used in the present study with *In*  
409 *Vivo* Experiments (ARRIVE) 2.0 guidelines complied. All animals were housed in the  
410 same room with controlled temperature, humidity, and light. A standard alternating 12  
411 h light/dark cycle was maintained. The health status and body weight of the rats were  
412 monitored every other day.

413

### 414 *Administration of Decoy ODN Nuclear Medicine*

415 Naked scrambled decoy ODN, also known as phosphorothioated double-stranded  
416 scrambled decoy ODN (with the sequences 5'-TTGCCGTACCTGACTTAGCC-3'  
417 and 3'-AACGGCATGGACTGAATCGG-5') and Naked NF- $\kappa$ B decoy ODN, also  
418 known as phosphorothioated double-stranded NF- $\kappa$ B decoy ODN (with sequences  
419 5'-CCTTGAAGGGATTTCCCTCC-3' and 3'-GGAACCTCCCTAAAGGGAGG-5')  
420 were adopted in the current study. A PLGA-scrambled decoy ODN conjugated to a  
421 fluorescent protein (6-FAM) was used in this study. The concentrations of scrambled  
422 decoy ODN in the naked scrambled decoy ODN solution, scrambled decoy  
423 ODN-loaded PLGA nanosphere solution, and 6-FAM-labeled scrambled decoy  
424 ODN-loaded PLGA nanosphere solution, as well as NF- $\kappa$ B decoy ODN in the naked  
425 NF- $\kappa$ B decoy ODN solution and NF- $\kappa$ B decoy ODN-loaded PLGA nanosphere  
426 solution, were 0.02% w/v (0.2 mg/mL). The concentration of HPC-H used in this  
427 study above all medicine was 3.3% (w/v) with 2.0% PLGA NS (20 mg/mL). Research  
428 reagents relating to NF- $\kappa$ B decoy ODN and NF- $\kappa$ B decoy ODN-loaded PLGA  
429 nanosphere used in the study were provided by AnGes, Inc. and HOSOKAWA  
430 MICRON CORPORATION.

431

### 432 *Surgical Procedure of Teeth Extraction*

433 The rats were randomly divided into five groups containing 12 animals each: one  
434 vehicle control [phosphate-buffered saline (PBS)] and four [naked scrambled decoy  
435 ODN (ScD), naked NF- $\kappa$ B Decoy ODN (NfD), PLGA-scrambled decoy ODN  
436 (PLGA-ScD), PLGA-NF- $\kappa$ B Decoy ODN (PLGA-NfD)] experimental groups  
437 (Supplementary Fig. 1 A, B). There was one group of 6-FAM-labeled  
438 PLGA-scrambled decoy ODN (6-FAM-PLGA-ScD) of two animals. All rats  
439 underwent bilateral maxillary first molar extraction surgery under general anesthesia,  
440 conducted by subcutaneous injection of a mixed anesthetic (medetomidine, 0.3 mg/kg;  
441 midazolam, 4 mg/kg; butorphanol, 5 mg/kg), followed by bilateral maxillary first  
442 molars extracted by specific forceps. Immediately after the extraction, 0.9%  
443 phosphate-buffered saline (PBS; pH 7.4) and specific nuclear medicines listed above  
444 were locally administered into the bilateral extraction socket according to the group  
445 design. No postoperative complications or syndromes were found in all rats.

446

447 ***Examination of Distribution Efficiency by 6-FAM-labeled scrambled decoy***  
448 ***ODN-loaded PLGA nanosphere***

449 To examine the distribution efficiency of the PLGA nanosphere, 6-FAM-labeled  
450 scrambled decoy ODN-loaded PLGA nanosphere was administered and observed  
451 with each animal, respectively, on D7 and D28. According to previous research,  
452 frozen, non-decalcified sections with a cryofilm transfer kit (Finetec, Gunma, Japan)  
453 were used for histological investigation (Kawamoto 2003; Yamaguchi et al. 2017;  
454 Keo et al. 2021). Bilateral hemimaxilla was frozen by quenching in cold hexane,  
455 embedded in SCEM compound (Section-Lab Co. Ltd, Hiroshima, Japan). The frozen  
456 SCEM samples were then cut in the sagittal plane with a disposable tungsten carbide  
457 steel blade (Leica Microsystems, Nussloch, Germany) using a microtome  
458 (CM3050sIV; Leica Biosystems). The trimmed surface was covered using an  
459 adhesive Kawamoto film (Cryofilm type 2C [9], Section-Lab, Co., Ltd), and each  
460 sample was sectioned with the film at a thickness of 5  $\mu$ m. Confocal laser scanning  
461 microscopy (CLSM) observations were performed using a Leica-type TCS SP8  
462 microscope (Leica; Tokyo, Japan), where micrographs were recorded at the excitation  
463 wavelength of 492 nm to observe fluorescence images under identical settings for  
464 comparison.

465

466 ***Dynamic Fluorescent Labeling of Extraction Socket***

467 For *in vivo* dynamic fluorescent labeling of bilateral extraction socket, two animals  
468 from each group were administered calcein (20 mg/kg; Sigma-Aldrich, St. Louis,  
469 Missouri, USA), demeclocycline hydrochloride (20 mg/kg; Sigma-Aldrich, St. Louis,  
470 Missouri, USA), and Alizarin complexone (20 mg/kg; ALC, Donjindo, Kumamoto,  
471 Japan) subcutaneously on days 6, 15, and 24 after tooth extraction, respectively. The  
472 samples were then thoroughly washed with phosphate-buffered saline (PBS) before  
473 fixation using 10% PBS-based formaldehyde fixative (pH 7.4) for 48 h at 4 °C under  
474 constant shaking motion. The undecalcified frozen blocks were prepared using the  
475 same method with a 5  $\mu$ m thickness of tissue section retrieved by adhesive Kawamoto  
476 film. Bone formation of extraction sockets according to the bone labeling schedule  
477 was observed using a BZ-X700 fluorescence microscope (Keyence Corp., Osaka,  
478 Japan)

479

480 ***Tissue Preparation***

481 A split-mouth design was prepared by maxillary right extraction socket tissue for  
482 alveolar bone morphological and histomorphometric evaluation (n = 5) and maxillary  
483 left extraction socket tissue for biochemical evaluation (n = 5). After 7 and 28 days

484 from teeth extraction, five animals from each group were euthanized using carbon  
485 dioxide gas. Maxillae with tooth extraction socket and the surrounding tissue were  
486 collected immediately after euthanization. For morphological and histomorphometric  
487 samples, the right hemimaxilla with extraction socket was fixed with 4%  
488 paraformaldehyde (pH 7.4, Wako Pure Chemicals) for 48 h at 4 °C. For biochemical  
489 evaluation of samples, the left hemimaxilla, including extraction socket tissues, was  
490 resected. Tissue samples of the extraction socket were transferred into liquid nitrogen  
491 immediately after collection.

492

### 493 ***Morphological Evaluation***

#### 494 *Three-Dimensional (3D) Micro-computed Tomography (Micro-CT) Analysis*

495 Alveolar bone morphological evaluation of the extraction sockets was performed  
496 using ex-vivo three-dimensional (3D) micro-computed tomography (micro-CT).  
497 Tissue samples were scanned using a micro-CT coupled to a desktop X-ray micro-CT  
498 system (InspeXio SMX-100CT; Shimadzu, Kyoto, Japan) and analyzed using 3D  
499 trabecular bone analysis software (TRI/3D-BON-FCS; RATOC System Engineering  
500 Co., Tokyo, Japan) according to the manufacturer's instructions. All fixed tissue  
501 samples were scanned with output settings of 75 kV and 140 mA and a scanning  
502 resolution of 8.0 µm. The volume of interest (VOI) for the analysis of 3D  
503 microstructural morphometry was defined by the borders, including the total tooth  
504 extraction socket region with a grid area of 25.3 mm<sup>3</sup> (LX: 2.5 mm, LY: 2.2 mm, LZ:  
505 4.6 mm). Calibration and adjustment were performed by the reference line of the  
506 mid-palatal suture plane and the maxillary palatal transverse plane of each sample  
507 (Supplementary Fig. 2 A-E). Vertical height loss of the extraction socket was  
508 measured and defined by vertical bone height changes of the extraction socket on D7  
509 and D28 separately. The cement enamel junction (CEJ) of M3 to the alveolar bone  
510 crest (ABC) of the M1 extraction socket was determined as the height changes of the  
511 extraction socket. The aspect of buccal, middle, palatal, mesial, and distal enclosing  
512 the extraction socket area was measured and evaluated in this study. Trabecular bone  
513 analysis was performed using the selected VOI, identified by the direct-measures  
514 technique (Hildebrand and Rüegsegger 1997). Trabecular Bone parameters were  
515 demonstrated using the following parameters: bone volume fraction (BV/TV, %),  
516 bone mineral density (BMD, mg/cm<sup>3</sup>), bone surface ratio (BS/BV, per mm),  
517 trabecular thickness (Tb.Th, µm), trabecular number (Tb.N, per mm), trabecular  
518 separation (Tb.Sp, µm), trabecular spacing (Tb.Spac, µm), bone marrow space star  
519 volume (V\*m.space, mm<sup>3</sup>), and trabecular star volume (V\*tr, mm<sup>3</sup>).

520

#### 521 ***Histomorphometric Evaluation***

522 After micro-CT analysis, the specimens were decalcified with 10% disodium  
523 ethylenediamine tetraacetate (EDTA) (pH 7.4) at 4 °C for 6 weeks and were



524 embedded in paraffin through standard dehydration and paraffin infiltration steps after  
525 decalcification. The paraffin-embedded tissues were cut at 4  $\mu\text{m}$  thickness using a  
526 rotary microtome (Leica, Nussloch, Germany) parallel to the sagittal plane of the right  
527 hemimaxilla. Histomorphometric evaluations included the histological observations of  
528 stained tissue sections examined under light microscopy (DXm1200; Nikon,  
529 Kanagawa, Japan) using the NIS-Elements D Imaging Software (Version 2.30, Nikon,  
530 Tokyo, Japan). The images were analyzed using ImageJ scientific software (ImageJ  
531 version 1.52; National Institutes of Health, Bethesda, USA). The region of interest  
532 (ROI) was determined to be a 330  $\mu\text{m}$   $\times$  409  $\mu\text{m}$  region in the mesial root socket,  
533 which was considered representative of the extraction socket area. Analysis was  
534 performed after obtaining three randomized tissue sections for each sample with five  
535 random images at 200 $\times$  magnification.

536

537 *Histochemical Staining of Tartrate-Resistant Acid Phosphatase (TRAP) for*  
538 *Multi-nucleated TRAP-Positive Cells Assessment*

539 To further analyze the catabolic activity in the alveolar bone, mono-nucleated and  
540 multi-nucleated osteoclasts and polarized resorbing osteoclasts were detected by  
541 staining with tartrate-resistant acid phosphatase (TRAP). TRAP staining kit (Fujifilm  
542 Wako Pure Chemical, Osaka, Japan) was used according to the manufacturer's  
543 protocol. The numbers of TRAP-positive cells per one section and per  $\text{mm}^2$  of the  
544 ROI were counted by a single examiner, and the averages were calculated.

545

546 *Histochemical Staining of Alkaline Phosphatase (ALP) for Bone Formation*  
547 *Assessment*

548 To examine alkaline phosphatase activity for bone formation assessment in the  
549 extraction socket, ALP-positive stained area (%) was analyzed using the ALP staining  
550 kit (Fujifilm Wako Pure Chemical, Osaka, Japan) at 37  $^{\circ}\text{C}$  for 30 min according to the  
551 manufacturer's instructions.

552

553 *Immunohistochemical Staining of Inflammatory Cytokines (IL-1 $\beta$ , TNF- $\alpha$ ),*  
554 *Osteoclastogenic, and Osteogenesis Markers (RANKL and TGF- $\beta$ 1)*

555 Sections were stained using the following primary antibodies for  
556 immunohistochemical analyses: anti-interleukin (IL)-1 $\beta$  (dilution ratio: 1:400) (Bioss,  
557 Woburn, MA); anti-tumor necrosis factor (TNF)- $\alpha$  (dilution ratio: 1:400) (Bioss,  
558 Woburn, MA); anti-transforming growth factor (TGF)- $\beta$ 1 (dilution ratio: 1:400) (Bioss,  
559 Woburn, MA); and anti-receptor activator of nuclear factor-kappa B ligand (RANKL)  
560 (dilution ratio: 1:400) (Bioss, Woburn, MA). After deparaffinization and rehydration,  
561 the samples were treated using 3% hydrogen peroxide (Abcam, Cambridge, UK) for  
562 10 min to quench the endogenous peroxidase activity. After incubating 30 min of  
563 normal goat serum to block non-specific binding at room temperature, primary  
564 antibodies with specific concentrations listed above were added to the sections and



565 incubated overnight at 4 °C. On the following day, VECTASTAIN Elite ABC Rabbit  
566 IgG Kit (Vector Labs, Burlingame, CA) was used by incubating with a biotinylated  
567 secondary antibody for 30 min. Subsequently, prepared VECTASTAIN ABC Reagent  
568 was applied to the slides, and sections were incubated for another 30 min. Sections  
569 were stained with 3,3'-Diaminobenzidine (DAB) (Abcam, Cambridge, UK) and  
570 counterstained with hematoxylin. The protein expression levels of IL-1 $\beta$ , TNF- $\alpha$ ,  
571 TGF- $\beta$ 1, and RANKL were semi-quantified by the percentage of immunopositive  
572 stained areas.

573

#### 574 **Biochemical Evaluation**

##### 575 *Reverse Transcription Quantitative Real-Time PCR (RT-qPCR) Analysis of* 576 *Inflammatory Cytokines (IL-1 $\beta$ and TNF- $\alpha$ ) and Osteoclastogenic, Osteogenesis* 577 *Markers (RANKL, OPG, and TGF- $\beta$ 1)*

578 The expression of genes related to inflammation and bone metabolism was examined  
579 by isolating total RNA from the ROI. RNA Isolation method from alveolar bone  
580 socket was followed as described in previous research (Carter et al. 2012). Total RNA  
581 was isolated using TRIzol<sup>®</sup> reagent (Life Technologies Invitrogen; Thermo Fisher  
582 Scientific, Carlsbad, CA, USA), followed by PrimeScript<sup>™</sup> RT Master Mix (Takara  
583 Bio, Otsu, Shiga, Japan) for cDNA synthesis in accordance with the manufacturer's  
584 instructions. Real-time PCR analysis was performed using the Probe qPCR Mix  
585 (Takara Bio, Otsu, Shiga, Japan) and Applied Biosystems 7500 Real-Time PCR  
586 System (Applied Biosystems, Foster City, CA, USA). Appropriate specific TaqMan  
587 Gene Expression Assay primers (Applied Biosystems; Thermo Fisher Scientific,  
588 Foster City, CA, USA) were chosen for real-time PCR amplification of rat GAPDH  
589 (glyceraldehyde-3-phosphate dehydrogenase) mRNA (GAPDH; Rn01775763\_g1), rat  
590 IL-1 $\beta$  (interleukin 1 beta) mRNA (Rn00580432\_m1), rat TNF- $\alpha$  (tumor necrosis  
591 factor-alpha) mRNA (Rn01525859\_g1), rat RANKL (Receptor Activation of Nuclear  
592 Factor- $\kappa$ B ligand) mRNA (Tnfsf11; Rn00589289\_m1), rat osteoprotegerin (OPG)  
593 mRNA (Tnfrsf11b; Rn00563499\_m1), and rat TGF- $\beta$ 1 (transforming growth  
594 factor-beta 1) mRNA (Rn00572010\_m1). Relative gene expression levels were  
595 calculated using the comparative Ct method normalized to GAPDH. To assess the  
596 capability and degree of bone resorption and turnover of the extraction sockets, the  
597 RANKL/OPG ratio was applied, and relative gene expression of RANKL/GAPDH  
598 over OPG/GAPDH was calculated.

599

#### 600 **Statistical Analysis**

601 The normality was assessed using the Shapiro–Wilk test, and the equality of variances  
602 was checked using Levene's test. For parametric analysis, intergroup comparisons  
603 were performed via one-way analysis of variance (ANOVA) followed by Tukey's  
604 post hoc test in micro-CT of height loss and trabecular bone parameters, along with  
605 TRAP, ALP, and IHC analysis following the same statistical strategy (n = 5 for each  
606 group). For non-parametric analysis to analyze the relative gene expression in

607 RT-qPCR analysis, the non-parametric Kruskal–Wallis test, followed by the Dunn’s  
608 test for multiple comparisons, was used to analyze the statistical significance among  
609 the groups (n = 5 for each group). Statistical analysis was performed using IBM SPSS  
610 Statistics for Windows, version 27.0 (IBM Corp., Armonk, NY., USA) and GraphPad  
611 Prism 9 (version 9.3.1; GraphPad Software Inc, San Diego, California, USA). The  
612 results are presented as mean ± standard deviation (n = 5 each). Statistical  
613 significance was accepted at  $p < 0.05$ .

614

## 615 **Acknowledgements**

616 We express our thanks and gratitude to Research Core Center, TMDU, for the  
617 technical support of NanoDrop™ One Microvolume UV-Vis Spectrophotometer  
618 (Thermo Scientific™) for micro-volume analysis of purified RNA and cDNA,  
619 inspeXio SMX-100CT and TRI/3D-BON-FCS for micro-CT scanning and analysis,  
620 TCS-SP8 for the observation of confocal laser scanning microscopy and BZ-X700 for  
621 the fluorescence microscopy. We also appreciate Medical Research Institute, TMDU,  
622 for sharing technical expertise of Applied Biosystems® 7500 Real-Time PCR System  
623 of RT-qPCR and CM3050sIV of microtome. We would like to thank Editage  
624 (www.editage.com) for English language editing.

625

## 626 **Additional Information**

### 627 **Funding**

628 This study was financially supported in part by Grants-in-Aid for Scientific Research  
629 (20K18750) (KAKENHI), from the Japanese Ministry of Education, Culture, Sports,  
630 Science, and Technology, Japan (Kasumigaseki, Chiyoda-ku, Tokyo). Under the joint  
631 research agreement, funding for some of research regents and free Medicine relating  
632 to NF-κB decoy ODN and NF-κB decoy ODN-loaded PLGA nanosphere used in the  
633 study were provided by AnGes, Inc. and HOSOKAWA MICRON CORPORATION.

634

635

### 636 **Author ORCIDs**

637 Albert Chun-shuo HUANG  [0000-0002-2156-9234](https://orcid.org/0000-0002-2156-9234) ✓

638 Yuji Ishida  [0000-0003-4973-8762](https://orcid.org/0000-0003-4973-8762) ✓

639

### 640 **Declaration of Conflicting Interests**

641 The authors declare that the research was conducted in the absence of any commercial  
642 or financial relationships that could be construed as a potential conflict of interest.  
643 The authors declare no conflicts of interest related to this study.

644

## 645 **Ethics**

646 All animal experiments were approved by the Institutional Animal Care and Use  
647 Committee of Tokyo Medical and Dental University (TMDU) (Approval No.  
648 A2020-141A, A2020-141C2).

649

## 650 **Additional files**

### 651 **Supplementary file**

652 Supplementary Table 1. Vertical bone height loss in the extraction socket on day 7  
653 and day 28

654 Supplementary Table 2. Trabecular bone analysis of extraction socket on day 7 and  
655 day 28

656 Supplementary Table 3. TRAP positive cell ratio of extraction socket on day 7 and  
657 day 28

658 Supplementary Table 4. ALP positive stained area ratio of extraction socket on day 7  
659 and day 28

660 Supplementary Table 5. Percentage of immunopositive stained areas (%) of extraction  
661 socket on day 7 and day 28

662 Supplementary Table 6. Relative gene expression level of extraction socket on day 7  
663 and day 28

664 Supplementary Figure 1. Schematic figure of decoy ODN and experimental timeline.

665 Supplementary Figure 2. Assessment of three-dimensional (3D) micro-computed  
666 tomography (micro-CT) analysis of the maxillary extraction socket.

667 Supplementary Figure 3. Negative antigen (tissue) controls of anti-interleukin (IL)-1 $\beta$ ,  
668 anti-tumor necrosis factor (TNF)- $\alpha$ , anti-transforming growth factor (TGF)- $\beta$ 1 and

669 anti-receptor activator of nuclear factor-kappa B ligand (RANKL) in  
670 immunohistochemical staining.

671

672

673

674

675

676

677

678

679

680

## 681 **References**

- 682 Ahn JD, Morishita R, Kaneda Y, Lee S-J, Kwon K-Y, Choi S-Y, Lee K-U, Park J-Y,  
683 Moon I-J, Park J-G, et al. 2002. Inhibitory effects of novel AP-1 decoy  
684 oligodeoxynucleotides on vascular smooth muscle cell proliferation in vitro and  
685 neointimal formation in vivo. *Circ Res.* 90 (12):1325–1332. DOI:  
686 <https://doi.org/10.1161/01.RES.0000023200.19316.D5> , PMID: 12089071  
687
- 688 Araújo MG, Silva CO, Misawa M, Sukekava F. 2015. Alveolar socket healing: what  
689 can we learn? *Periodontology 2000.* 68 (1):122–134. DOI:  
690 <https://doi.org/10.1111/prd.12082>  
691
- 692 Ashman A. 2000. Postextraction ridge preservation using a synthetic alloplast.  
693 *Implant Dent.* 9 (2):168–176. DOI: 10.1097/00008505-200009020-00011 , PMID:  
694 11307396  
695
- 696 Avila-Ortiz G, Chambrone L, Vignoletti F. 2019. Effect of alveolar ridge preservation  
697 interventions following tooth extraction: A systematic review and meta-analysis. *J*  
698 *Clin Periodontol.* 46:195-223. DOI: <https://doi.org/10.1111/jcpe.13057>  
699
- 700 Avila-Ortiz G, Elangovan S, Kramer K, Blanchette D, Dawson D. 2014. Effect of  
701 alveolar ridge preservation after tooth extraction: A systematic review and  
702 meta-analysis. *J Dent Res.* 93 (10):950-958. DOI:  
703 <https://doi.org/10.1177/0022034514541127>  
704
- 705 Bassir SH, Alhareky M, Wangsrimongkol B, Jia Y, Karimbux N. 2018. Systematic  
706 review and meta-analysis of hard tissue outcomes of alveolar ridge preservation. *Int J*  
707 *Oral Maxillofac Implants.* 33 (5):979-994. DOI: 10.11607/jomi.6399 , PMID:  
708 30231083  
709
- 710 Bharti AC, Takada Y, Aggarwal BB. 2004. Curcumin (diferuloylmethane) inhibits  
711 receptor activator of NF-κB ligand-induced NF-κB activation in osteoclast precursors  
712 and suppresses osteoclastogenesis. *J Immunol.* 172 (10):5940–5947. DOI:  
713 <https://doi.org/10.4049/jimmunol.172.10.5940>  
714
- 715 Carter LE, Kilroy G, Gimble JM, Floyd ZE. 2012. An improved method for isolation  
716 of RNA from bone. *BMC Biotechnol.* 12:5. DOI:  
717 <https://doi.org/10.1186/1472-6750-12-5>  
718
- 719 Couso-Queiruga E, Stuhr S, Tattan M, Chambrone L, Avila-Ortiz G. 2021.  
720 Post-extraction dimensional changes: A systematic review and meta-analysis. *J Clin*  
721 *Periodontol.* 48 (1):127–145. DOI: <https://doi.org/10.1111/jcpe.1339>  
722

- 723 Deng F, Chen X, Liao Z, Yan Z, Wang Z, Deng Y, Zhang Q, Zhang Z, Ye J, Qiao M.  
724 2014. A simplified and versatile system for the simultaneous expression of multiple  
725 sirnas in mammalian cells using gibson DNA assembly. *PloS One*. 9 (11):e113064.  
726 DOI: <https://doi.org/10.1371/journal.pone.0113064>
- 727
- 728 De Stefano D, De Rosa G, Maiuri MC, Ungaro F, Quaglia F, Iuvone T, Cinelli MP,  
729 La Rotonda MI, Carnuccio R. 2009. Oligonucleotide decoy to NF- $\kappa$ B slowly released  
730 from PLGA microspheres reduces chronic inflammation in rat. *Pharmacol Res*. 60  
731 (1):33-40. DOI: <https://doi.org/10.1016/j.phrs.2009.03.012>
- 732
- 733 De Rosa G, Maiuri MC, Ungaro F, De Stefano D, Quaglia F, La Rotonda MI,  
734 Carnuccio R. 2005. Enhanced intracellular uptake and inhibition of NF- $\kappa$ B activation  
735 by decoy oligonucleotide released from PLGA microspheres. *J Gene Med*. 7 (6):771–  
736 781. DOI: <https://doi.org/10.1002/jgm.724>
- 737
- 738 Farahmand L, Darvishi B, Majidzadeh-A K. 2017. Suppression of chronic  
739 inflammation with engineered nanomaterials delivering nuclear factor  $\kappa$ b transcription  
740 factor decoy oligodeoxynucleotides. *Drug Deliv*. 24 (1):1249-1261. DOI:  
741 <https://doi.org/10.1080/10717544.2017.1370511>
- 742
- 743 Farina R, Trombelli L. 2011. Wound healing of extraction sockets. *Endodontic Topics*.  
744 25 (1):16-43. DOI: <https://doi.org/10.1111/etp.12016>
- 745
- 746 Hansson S, Halldin A. 2012. Alveolar ridge resorption after tooth extraction: A  
747 consequence of a fundamental principle of bone physiology. *J Dent Biomech*.  
748 3:1758736012456543. DOI: 10.1177/1758736012456543 , PMID: 22924065 ,  
749 PMCID: PMC3425398
- 750
- 751 Hildebrand T, Rügsegger P. 1997. A new method for the model-independent  
752 assessment of thickness in three-dimensional images. *J Microsc*. 185(1):67-75. DOI:  
753 <https://doi.org/10.1046/j.1365-2818.1997.1340694.x>
- 754
- 755 Hile DD, Sonis ST, Doherty SA, Tian XY, Zhang Q, Jee WS, Trantolo DJ. 2005.  
756 Dimensional stability of the alveolar ridge after implantation of a bioabsorbable bone  
757 graft substitute: A radiographic and histomorphometric study in rats. *J Oral Implantol*.  
758 31 (2):68-76. DOI: <https://doi.org/10.1563/0-727.1>
- 759
- 760 Hoda N, Saifi AM, Giraddi GB. 2016. Clinical use of the resorbable bioscaffold poly  
761 lactic co-glycolic acid (PLGA) in post-extraction socket for maintaining the alveolar  
762 height: A prospective study. *J Oral Biol Craniofac Res*. 6 (3):173–178. DOI:  
763 <https://doi.org/10.1016/j.jobcr.2016.03.001>
- 764
- 765 Jimi E, Aoki K, Saito H, D'Acquisto F, May MJ, Nakamura I, Sudo T, Kojima T,  
766 Okamoto F, Fukushima H, et al. 2004. Selective inhibition of NF- $\kappa$ B blocks

- 767 osteoclastogenesis and prevents inflammatory bone destruction in vivo. *Nat Med.* 10  
768 (6):617–624. DOI: <https://doi.org/10.1038/nm1054>
- 769
- 770 Johnson K. 1963. A study of the dimensional changes occurring in the maxilla after  
771 tooth extraction. Part 1. Normal healing. *Aust Dent J.* 8 (5):428-433. DOI:  
772 <https://doi.org/10.1111/j.1834-7819.1963.tb02649.x>
- 773
- 774 Kawamoto T. 2003. Use of a new adhesive film for the preparation of multi-purpose  
775 fresh-frozen sections from hard tissues, whole-animals, insects and plants. *Arch*  
776 *Histol Cytol.* 66(2):123–143. DOI: <https://doi.org/10.1679/aohc.66.123>
- 777
- 778 Karst M, Gorny G, Galvin RJS, Oursler MJ. 2004. Roles of stromal cell RANKL,  
779 OPG, and M-CSF expression in biphasic TGF- $\beta$  regulation of osteoclast  
780 differentiation. *J Cell Physiol.* 200 (1):99–106. DOI:  
781 <https://doi.org/10.1002/jcp.20036>
- 782
- 783 Katagiri T, Takahashi N. 2002. Regulatory mechanisms of osteoblast and osteoclast  
784 differentiation. *Oral Dis.* 8 (3):147-159. DOI:  
785 <https://doi.org/10.1034/j.1601-0825.2002.01829.x>
- 786
- 787 Keo P, Matsumoto Y, Shimizu Y, Nagahiro S, Ikeda M, Aoki K, Ono T. 2021. A pilot  
788 study to investigate the histomorphometric changes of murine maxillary bone around  
789 the site of mini-screw insertion in regenerated bone induced by anabolic reagents. *Eur*  
790 *J Orthod.* 43(1):86–93. DOI: <https://doi.org/10.1093/ejo/cjaa018>
- 791
- 792 Kim DJ, Cha JK, Yang C, Cho A, Lee JS, Jung UW, Kim CS, Lee SJ, Choi SH. 2012.  
793 Changes in periodontium after extraction of a periodontally-involved tooth in rats. *J*  
794 *Periodontal Implant Sci.* 42(5):158-165.  
795 DOI: <https://doi.org/10.5051/jpis.2012.42.5.158>
- 796
- 797 Li K, Ishida Y, Hatano-Sato K, Ongprakobkul N, Hosomichi J, Usumi-Fujita R,  
798 Kaneko S, Yamaguchi H, Ono T. 2021. Nuclear factor-kappa B decoy  
799 oligodeoxynucleotide-loaded poly lactic-co-glycolic acid nanospheres promote  
800 periodontal tissue healing after tooth replantation in rats. *J Periodontol.* 93 (3): 458–  
801 470. DOI: <https://doi.org/10.1002/JPER.21-0134>
- 802
- 803 Lin T-H, Pajarinen J, Lu L, Nabeshima A, Cordova L, Yao Z, Goodman S. 2017.  
804 Nf- $\kappa$ b as a therapeutic target in inflammatory-associated bone diseases. *Adv Protein*  
805 *Chem Struct Biol.* 107:117-154. DOI: <https://doi.org/10.1016/bs.apcsb.2016.11.002>
- 806
- 807 Lin TH, Pajarinen J, Sato T, Loi F, Fan C, Cordova LA, Nabeshima A, Gibon E,  
808 Zhang R, Yao Z et al. 2016. NF- $\kappa$ B decoy oligodeoxynucleotide mitigates wear  
809 particle-associated bone loss in the murine continuous infusion model. *Acta Biomater.*  
810 41:273-281. DOI: <https://doi.org/10.1016/j.actbio.2016.05.038>



- 811  
812 Liu T, Zhang L, Joo D, Sun S-C. 2017. Nf- $\kappa$ b signaling in inflammation. Signal  
813 Transduct Target Ther. 2 (1):1-9. DOI: <https://doi.org/10.1038/sigtrans.2017.23>  
814
- 815 Manolagas SC. 2000. Birth and death of bone cells: Basic regulatory mechanisms and  
816 implications for the pathogenesis and treatment of osteoporosis. Endocr Rev. 21  
817 (2):115-137. DOI: <https://doi.org/10.1210/edrv.21.2.0395>  
818
- 819 Mehta M, Paudel KR, Shukla SD, Allam VSRR, Kannaujiya VK, Panth N, Das A,  
820 Parihar VK, Chakraborty A, Ali MK, et al. 2021. Recent trends of NF $\kappa$ B decoy  
821 oligodeoxynucleotide-based nanotherapeutics in lung diseases. J Control Release.  
822 337:629–644. DOI: <https://doi.org/10.1016/j.jconrel.2021.08.010>  
823
- 824 Morishita R, Tomita N, Kaneda Y, Ogihara T. 2004. Molecular therapy to inhibit  
825 NF $\kappa$ B activation by transcription factor decoy oligonucleotides. Curr Opin Pharmacol.  
826 4 (2):139–146. DOI: <https://doi.org/10.1016/j.coph.2003.10.008>  
827
- 828 Osako MK, Nakagami H, Morishita R. 2011. Development and modification of decoy  
829 oligodeoxynucleotides for clinical application. Nucleic Acid Drugs. 49-59. DOI:  
830 [https://doi.org/10.1007/12\\_2011\\_139](https://doi.org/10.1007/12_2011_139)  
831
- 832 Pagni G, Pellegrini G, Giannobile WV, Rasperini G. 2012. Postextraction alveolar  
833 ridge preservation: Biological basis and treatments. Int J Dent. 2012:151030. DOI:  
834 <https://doi.org/10.1155/2012/151030>  
835
- 836 Park K-K, Deok Ahn J, Lee I-K, Magae J, Heintz NH, Kwak J-Y, Lee Y-C, Cho Y-S,  
837 Kim H-C, Chae Y-M, et al. 2003. Inhibitory effects of novel E2F decoy  
838 oligodeoxynucleotides on mesangial cell proliferation by coexpression of E2F/DP.  
839 Biochem Biophys Res Commun. 308 (4):689–697. DOI:  
840 [https://doi.org/10.1016/S0006-291X\(03\)01455-4](https://doi.org/10.1016/S0006-291X(03)01455-4)  
841
- 842 Sun Z, Herring SW, Tee BC, Gales J. 2013. Alveolar ridge reduction after tooth  
843 extraction in adolescents: An animal study. Arch Oral Biol. 58 (7):813-825. DOI:  
844 <https://doi.org/10.1016/j.archoralbio.2012.12.013>  
845
- 846 Takai H, Kanematsu M, Yano K, Tsuda E, Higashio K, Ikeda K, Watanabe K,  
847 Yamada Y. 1998. Transforming growth factor- $\beta$  stimulates the production of  
848 osteoprotegerin/osteoclastogenesis inhibitory factor by bone marrow stromal cells. J  
849 Biol Chem. 273 (42):27091-27096. DOI: <https://doi.org/10.1074/jbc.273.42.27091>  
850
- 851 Tahara K, Samura S, Tsuji K, Yamamoto H, Tsukada Y, Bando Y, Tsujimoto H,  
852 Morishita R, Kawashima Y. 2011. Oral nuclear factor- $\kappa$ B decoy oligonucleotides  
853 delivery system with chitosan modified poly(d,l-lactide-co-glycolide) nanospheres for  
854 inflammatory bowel disease. Biomaterials. 32 (3):870–878. DOI:



855 <https://doi.org/10.1016/j.biomaterials.2010.09.034>

856

857 Teng Y-TA, Nguyen H, Gao X, Kong Y-Y, Gorczynski RM, Singh B, Ellen RP,  
858 Penninger JM. 2000. Functional human T-cell immunity and osteoprotegerin ligand  
859 control alveolar bone destruction in periodontal infection. *J Clin Invest.* 106 (6):R59–  
860 R67. DOI: 10.1172/JCI10763.

861

862 Tsujimoto H, Kawashima Y. 2018. PLGA nanoparticle design and preparation for  
863 DDS and medical device. In: *Nanoparticle Technology Handbook*. Elsevier. p. 451–  
864 460. DOI: <https://doi.org/10.1016/B978-0-444-64110-6.00017-2>

865

866 Xie Y, Li S, Zhang T, Wang C, Cai X. 2020. Titanium mesh for bone augmentation in  
867 oral implantology: Current application and progress. *Int J Oral Sci.* 12 (1):1-12. DOI:  
868 <https://doi.org/10.1038/s41368-020-00107-z>

869

870 Yakubov LA, Deeva EA, Zarytova VF, Ivanova EM, RYTE AS, Yurchenko LV,  
871 Vlassov VV. 1989. Mechanism of oligonucleotide uptake by cells: involvement of  
872 specific receptors? *Proc Natl Acad Sci USA.* 86 (17):6454–6458. DOI:  
873 <https://doi.org/10.1073/pnas.86.17.6454>

874

875 Yamaguchi H, Ishida Y, Hosomichi J, Suzuki J, Hatano K, Usumi-Fujita R, Shimizu  
876 Y, Kaneko S, Ono T. 2017. Ultrasound microbubble-mediated transfection of NF-κB  
877 decoy oligodeoxynucleotide into gingival tissues inhibits periodontitis in rats in vivo.  
878 Reddy SV, editor. *PLoS One.* 12 (11):e0186264. DOI:  
879 <https://doi.org/10.1371/journal.pone.0186264>

880

881 Yamaguchi H, Ishida Y, Hosomichi J, Suzuki JI, Usumi-Fujita R, Shimizu Y, Kaneko  
882 S, Ono T. 2017. A new approach to transfect NF-κB decoy oligodeoxynucleotides  
883 into the periodontal tissue using the ultrasound-microbubble method. *Int J Oral Sci.*  
884 9(2):80-86. DOI: <https://doi.org/10.1038/ijos.2017.10>

885

886 Zaki Ahmad M, Akhter S, Mallik N, Anwar M, Tabassum W, Jalees Ahmad F. 2013.  
887 Application of decoy oligonucleotides as novel therapeutic strategy: A contemporary  
888 overview. *Curr Drug Discov Technol.* 10 (1):71-84. DOI:  
889 <https://doi.org/10.2174/157016313804998898>

890

891

892

893

894

895

896

897

898

## 899 Figure Legends

Figure 1

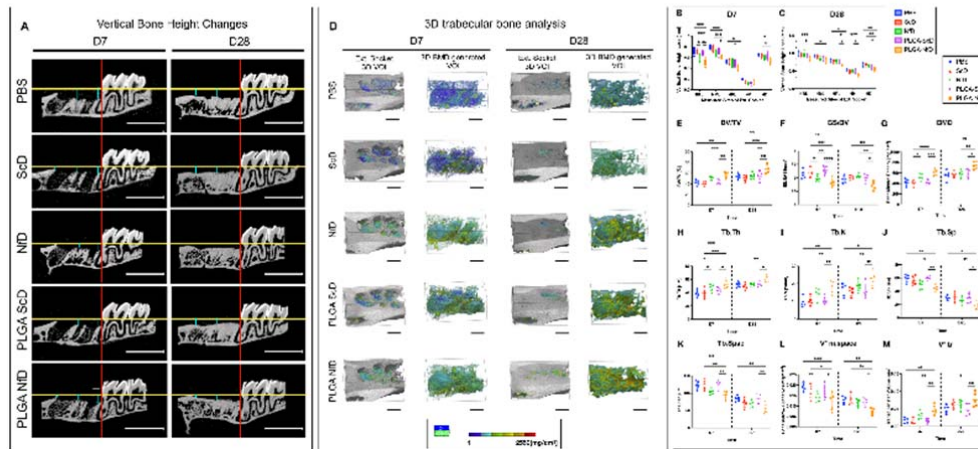

900

901

### Figure 1.

902

**A, B, C, PLGA-NfD prevents vertical bone loss of tooth-extraction socket and preserves the alveolar ridge, as observed on D7 and D28.**

903

904 The sagittal view of representative micro-computed tomography (CT) images  
 905 shows loss of vertical alveolar bone height in each group. The blue lines  
 906 indicate the extent of bone loss in each group. Linear measurement of the loss  
 907 of vertical height was defined by vertical height changes of the socket;  
 908 measurements were performed in the volume of interest (VOI) from the  
 909 cement enamel junction of M3 to the alveolar bone crest of the socket. (Scale  
 910 bar = 3 mm). Values are presented as mean  $\pm$  standard deviation (SD), (n = 5).  
 911 \*: P < 0.05, \*\*: P < 0.01, \*\*\*: P < 0.001.

912

**D, Representative three-dimensional (3D) images of the VOI at the tooth-extraction socket.**

913

914 Trabecular 3D-BMD-generated VOI was used as the area of measurement for  
 915 the alveolar bone analysis. The BMD value is indicated by the BMD color  
 916 transition scale. (Scale bar = 1 mm)

917

**E-M, 3D micro-CT trabecular bone analysis of the tooth-extraction socket on D7 and D28.**

918

919 On D7, the PLGA-NfD and NfD groups showed an increase in BV/TV, BMD,  
 920 Tb.Th, Tb.N, and V\*tr and a decrease in BS/BV, Tb.Sp, Tb.Spac, and  
 921 V\*m.space; On D28, the PLGA-NfD group showed an increase in BV/TV, BMD,  
 922 Tb.Th, Tb.N, and V\*tr and a decrease in BS/BV, Tb.Sp, Tb.Spac, and  
 923 V\*m.space.

924

925 Values are presented as mean  $\pm$  SD, (n = 5). \*: P < 0.05, \*\*: P < 0.01, \*\*\*: P < 0.001, \*\*\*\*: P < 0.0001.

926 Abbreviations: HBL, buccal height loss of extraction socket; HML, middle  
927 height loss of extraction socket; HPL, palatal height loss of extraction socket;  
928 HM, mesial height loss of extraction socket; HD, distal height loss of extraction  
929 socket. BV/TV, bone volume fraction (%); BMD, bone mineral density (mg/cm<sup>3</sup>);  
930 BS/BV, bone surface ratio (per mm); Tb.Th, trabecular thickness (μm); Tb.N,  
931 trabecular number (per mm); Tb.Sp, trabecular separation (μm); Tb.Spac,  
932 trabecular spacing (μm); V\*m.space, bone marrow space star volume (mm<sup>3</sup>);  
933 V\*tr, trabecular star volume (mm<sup>3</sup>); D7, post-extraction day 7; D28,  
934 post-extraction day 28; PBS, PBS group; ScD, naked scrambled decoy group;  
935 NfD, naked NF-κB decoy group; PLGA-ScD, Scrambled decoy ODN-loaded  
936 PLGA nanosphere group; PLGA-NfD, NF-κB decoy ODN-loaded PLGA  
937 nanosphere group.

938

939

940

941

942

943

944

945

946

947

948

949

950

951

952

953

954

955

956

957

Figure 2

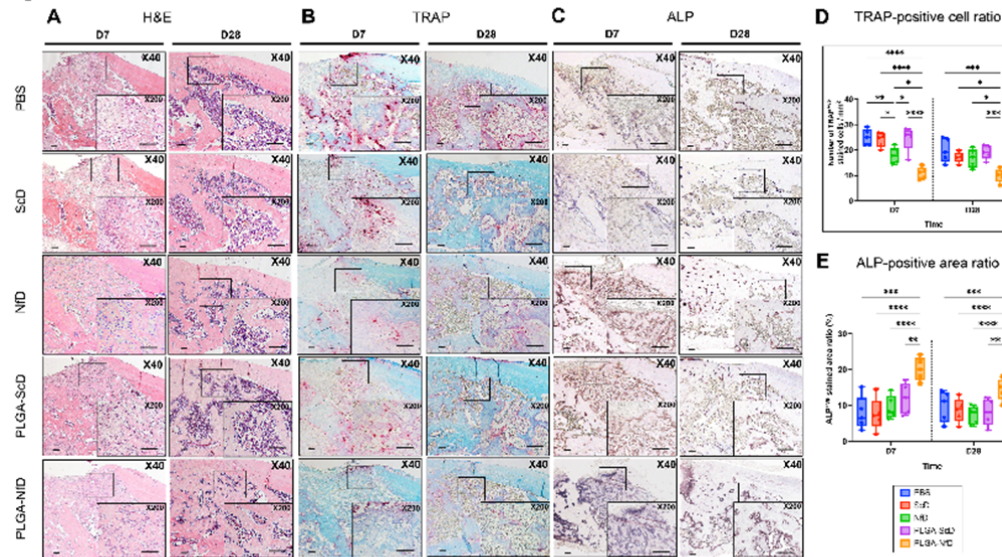

958

959

**Figure 2.**

960

**Representative findings of the mesial root socket on D7 and D28 after M1 extraction in all groups (A-C) and relative semi-quantitative analysis of tartrate-resistant acid phosphatase (TRAP) and alkaline phosphatase (ALP) staining of the M1 extraction socket (D, E).**

961

**A, Hematoxylin and eosin (H&E) staining; B, TRAP staining; C, ALP staining.**

962

On D7, reduced inflammatory infiltrates and osteoclast-like cells were observed in the PLGA-NfD group with increased woven and trabecular bone. TRAP staining in the PLGA-NfD group showed reduced tendency of reaction while ALP staining presented with an enhanced one. On D28, the other four groups showed more inflammatory infiltrates and less trabecular bone than the PLGA-NfD group. The PLGA-NfD group showed greater and more organized bone formation with a smaller number of inflammatory cells associated with thicker bone trabeculae, with reduced TRAP and enhanced ALP reaction. Original magnification 40x and 200x are shown in each representative histological image. Scale Bar = 100  $\mu$ m.

963

**D, Number of TRAP-positive multi-nuclear cells per mm<sup>2</sup>; E, Stained area ratio of ALP-positive reaction.**

964

On D7, the PLGA-NfD group showed lesser TRAP-positive osteoclast cells per mm<sup>2</sup> than the other four groups. The NfD group also showed a lower value than the PBS, ScD, and PLGA-ScD groups, and significantly greater than the PLGA-NfD group. The ALP staining results showed greater value of ALP-positive stained area only in the PLGA-NfD group. On D28, only the PLGA-NfD group showed a lower value of TRAP results than the other four groups with a greater value of ALP results than the other four groups.

965

Abbreviations: D7, post-extraction day 7; D28, post-extraction day 28; PBS,

986 PBS group; ScD, naked scrambled decoy group; NfD, naked NF- $\kappa$ B decoy  
987 group; PLGA-ScD, Scrambled decoy ODN-loaded PLGA nanosphere group;  
988 PLGA-NfD, NF- $\kappa$ B decoy ODN-loaded PLGA nanosphere group. Values are  
989 presented as mean  $\pm$  standard deviation, (n = 5). \*: P < 0.05, \*\*: P < 0.01, \*\*\*: P  
990 < 0.001, \*\*\*\*: P < 0.0001.  
991  
992  
993  
994  
995  
996  
997  
998  
999  
1000  
1001  
1002  
1003  
1004  
1005  
1006  
1007  
1008  
1009

Figure 3

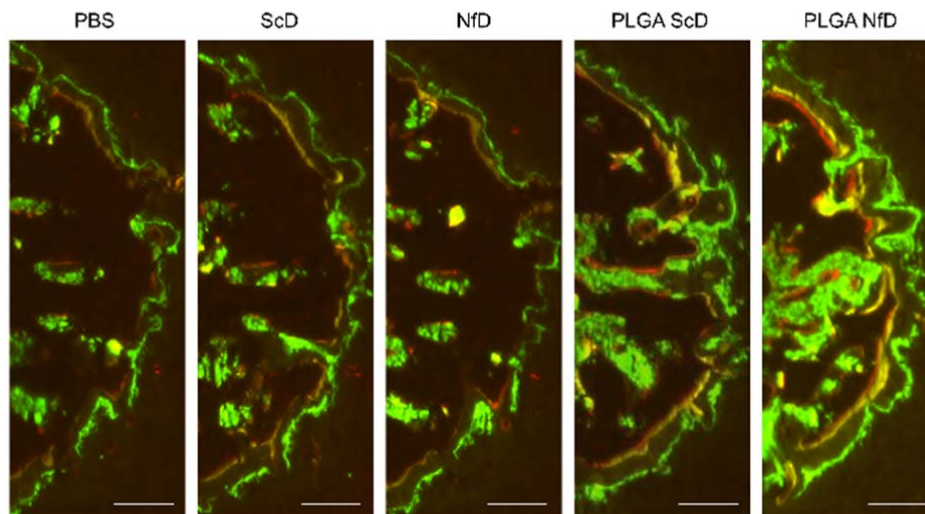

1010



1011 **Figure 3.**  
 1012 **Assessment of dynamic fluorescent bone labeling of tooth-extraction**  
 1013 **sockets.**  
 1014 Representative fluorescent images of the mesial portion of the M1 mesial  
 1015 socket with bone labeling fluorescent reagent of calcein (day 6),  
 1016 demeclocycline hydrochloride (day 15), and alizarin complexone (day 24) after  
 1017 tooth extraction, respectively. PLGA-NfD demonstrated a tendency of  
 1018 increased bone formation in both calcein-to-demeclocycline and  
 1019 demeclocycline-to-alizarin-labeled surfaces compared to that in the other four  
 1020 groups. Original magnification 40x; Scale bar = 100  $\mu$ m  
 1021 Abbreviations: PBS, PBS group; ScD, naked scrambled decoy group; NfD,  
 1022 naked NF- $\kappa$ B decoy group; PLGA-ScD, Scrambled decoy ODN-loaded PLGA  
 1023 nanosphere group; PLGA-NfD, NF- $\kappa$ B decoy ODN-loaded PLGA nanosphere  
 1024 group.  
 1025  
 1026  
 1027  
 1028  
 1029  
 1030

Figure 4

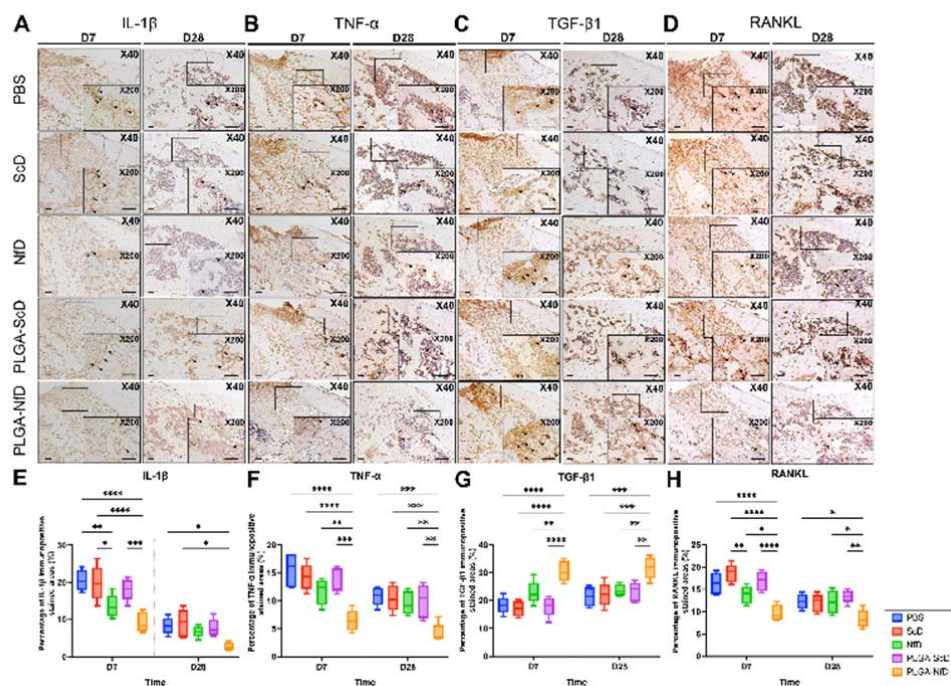

1031  
 1032 **Figure 4.**  
 1033 **Representative immunohistochemical staining of the mesial root socket**  
 1034 **on D7 and D28 after M1 extraction in all groups (A-D) and relative**  
 1035 **semi-quantitative analysis of the percentage of immunopositive stained**

1036 **areas (%) of the extraction socket (E-H).**  
 1037 **A/E, IL-1 $\beta$ ; B/F, TNF- $\alpha$ ; C/G, TGF- $\beta$ 1; D/H, RANKL.**  
 1038 On D7 and D28, PLGA-NfD demonstrated a lower immunopositive stained  
 1039 ratio for IL-1 $\beta$ , TNF- $\alpha$ , and RANKL and a high ratio for TGF- $\beta$ 1. The NfD group  
 1040 showed significantly lower IL-1 $\beta$  and RANKL expression only on D7; the  
 1041 expression of other factors in this group was similar to that in the PBS, ScD,  
 1042 and PLGA-ScD groups on D7 and D28.  
 1043 Abbreviations: D7, post-extraction day 7; D28, post-extraction day 28; PBS,  
 1044 PBS group; ScD, naked scrambled decoy group; NfD, naked NF- $\kappa$ B decoy  
 1045 group; PLGA-ScD, Scrambled decoy ODN-loaded PLGA nanosphere group;  
 1046 PLGA-NfD, NF- $\kappa$ B decoy ODN-loaded PLGA nanosphere group. Values are  
 1047 presented as mean  $\pm$  standard deviation, (n = 5). \*: P < 0.05, \*\*: P < 0.01, \*\*\*: P  
 1048 < 0.001, \*\*\*\*: P < 0.0001. Original magnification 40x and 200x were shown in  
 1049 each representative histological image. Scale Bar = 100  $\mu$ m.  
 1050  
 1051  
 1052  
 1053  
 1054  
 1055

Figure 5

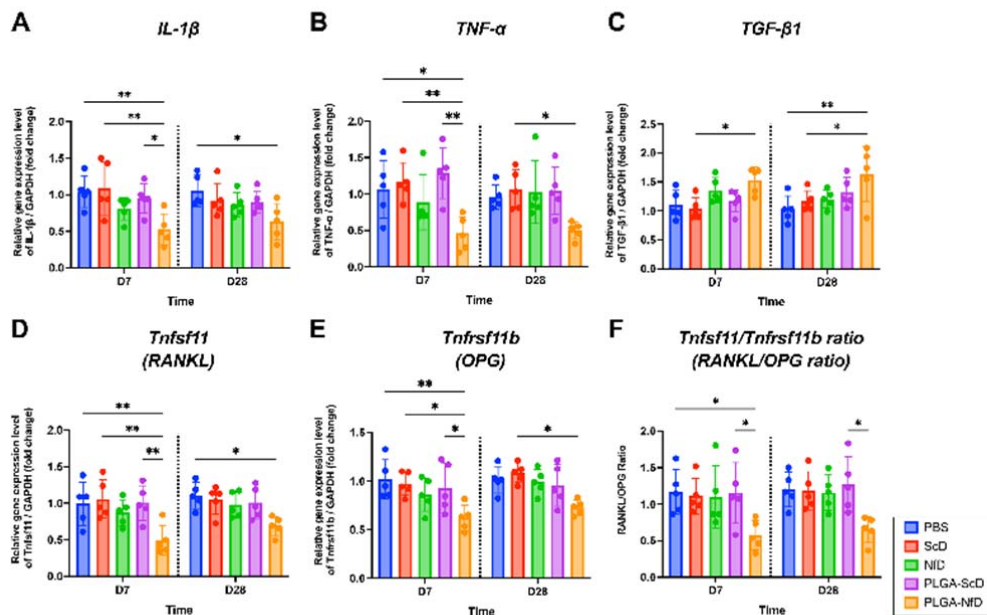

1056  
 1057 **Figure 5.**  
 1058 **Reverse transcription quantitative real-time polymerase chain reaction**  
 1059 **analysis of inflammatory cytokines (IL-1 $\beta$  and TNF- $\alpha$ ) and**  
 1060 **osteoclastogenic, osteogenesis markers (RANKL, OPG, and TGF- $\beta$ 1) of**



1061 **alveolar extraction bone tissue on D7 and D28 after tooth extraction.**  
1062 Relative gene expression of **(A)** IL-1 $\beta$ , **(B)** TNF- $\alpha$  **(C)** TGF- $\beta$ 1 **(D)** Tnfsf11  
1063 **(RANKL)** **(E)** OPG (Tnfrsf11b) / GAPDH (fold change) and **(F)**  
1064 Tnfsf11/Tnfrsf11b (RANKL/OPG) ratio is presented in the graph.  
1065 On D7, the PLGA-NfD group showed lower relative gene expression of IL-1 $\beta$   
1066 and TNF- $\alpha$  than the PBS, ScD, and PLGA-ScD groups; lower RANKL and  
1067 OPG expression than the PBS, ScD, and PLGA-ScD groups; lower  
1068 RANKL/OPG ratio than the PLGA-ScD group. On D28, the PLGA-NfD group  
1069 showed lower IL-1 $\beta$  expression than the PBS group; lower TNF- $\alpha$  expression  
1070 than the ScD group; lower RANKL expression than the PBS group; and lower  
1071 OPG expression than the ScD group. No significant difference in the  
1072 RANKL/OPG ratio was found among the groups on D28.  
1073 The PLGA-NfD group demonstrated greater relative gene expression of  
1074 TGF $\beta$ 1 on both D7 and D28 than the ScD group. The TGF $\beta$ 1 expression on  
1075 D28 was also significantly greater in the PLGA-NfD group than in the PBS  
1076 group.  
1077 Values are presented as mean  $\pm$  standard deviation, (n = 5). \*: P < 0.05, \*\*: P <  
1078 0.01.  
1079 Abbreviations: D7, post-extraction day 7; D28, post-extraction day 28; PBS,  
1080 PBS group; ScD, naked scrambled decoy group; NfD, naked NF- $\kappa$ B decoy  
1081 group; PLGA-ScD, Scrambled decoy ODN-loaded PLGA nanosphere group;  
1082 PLGA-NfD, NF- $\kappa$ B decoy ODN-loaded PLGA nanosphere group.  
1083  
1084  
1085  
1086  
1087  
1088  
1089  
1090  
1091  
1092  
1093  
1094  
1095  
1096  
1097  
1098  
1099  
1100  
1101  
1102  
1103  
1104

1105

Figure 6

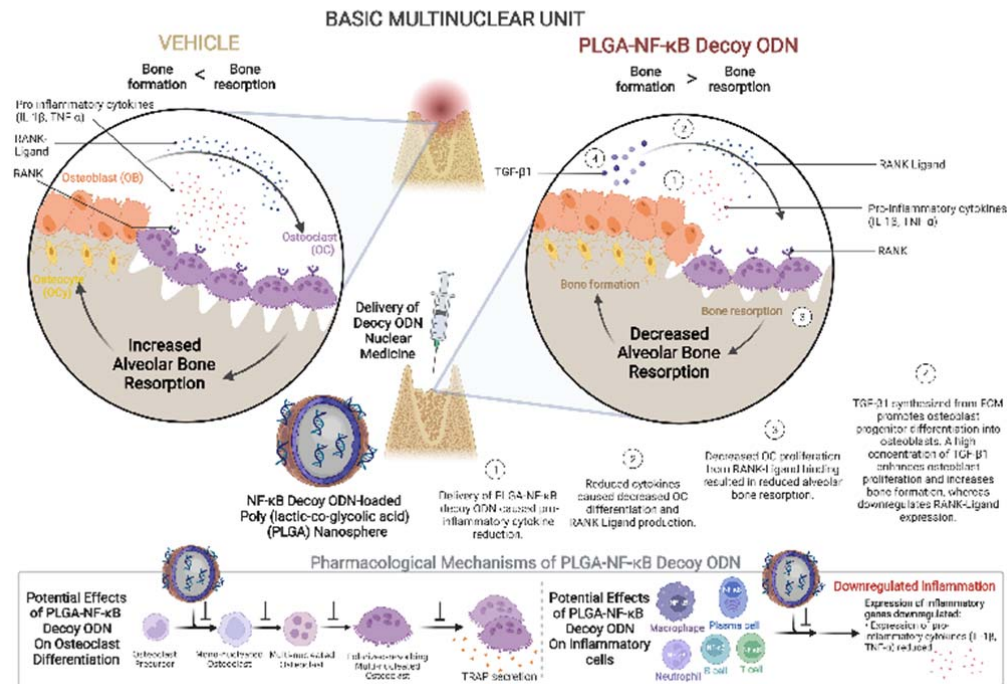

1106

1107

**Figure 6.**

1108

**Mechanism of PLGA-NF- $\kappa$ B decoy ODN (PLGA-NfD) on extraction socket tissue**

1109

1110

Schematic illustration of the effect of PLGA-NfD on osteoclast differentiation

1111

and inflammatory cells, including neutrophils, T- and B-lymphocytes, plasma

1112

cells, and macrophages. PLGA-NfD demonstrates the usefulness of the PLGA

1113

NS technique for NF- $\kappa$ B decoy ODN transfection into the extraction socket

1114

under inflammatory healing conditions. Local administration of PLGA-NfD has

1115

the clinical potential of preventing dimensional loss at the healing extraction

1116

socket and thereby allowing predictable prosthetic rehabilitation. Abbreviations:

1117

PLGA, poly (lactic-co-glycolic acid); NF- $\kappa$ B, nuclear factor-kappa B; ODN,

1118

oligodeoxynucleotide.

1119

1120

1121

1122

1123

1124

1125

1126

1127

1128

1129

1130

Figure 7

Histological Image after Administration of 6-FAM-labeled scrambled decoy ODN-loaded PLGA nanosphere in Extraction Socket

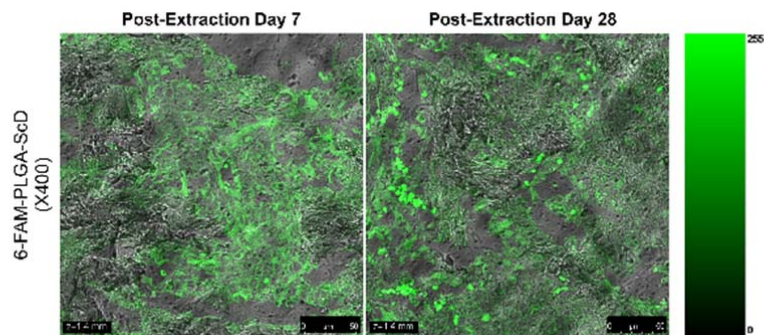

1131

1132

**Figure 7.**

1133 Representative fluorescence histological image after 6-FAM-labeled  
1134 scrambled decoy ODN-loaded PLGA nanosphere administration in extraction  
1135 socket on post-extraction day 7 and day 28. Original magnification 400x; Scale  
1136 Bar = 50 μm

1137 Abbreviations: 6-FAM-PLGA-ScD, 6-FAM-labeled PLGA-scrambled decoy  
1138 ODN.

1139

1140
